# Supplementary material
Source: publisher site journal article supplement (https://www.dovepress.com/article/280051)
Supplement: Supplementary file 1 [file get_supplementary_file.php]

# Supplementary Material

## Search Strategies

Searches were constructed from medical subject headings (MeSH; MEDLINE®) and EMTREE® (EMBASE®) index terms (Table 8). The initial search strategy was constructed for MEDLINE® and later adapted for EMBASE. Searches utilized keyword equivalents for index terms to identify relevant, newly published, and/or non-indexed literature in both databases. Searches were run in each online database on July 9, 2018.

**Table S1 Search strings for real-world utilization patterns and costs associated with oral SGA** **therapy**

| **Concept** | **PubMed (MeSH and keyword terms)** | **EMBASE (EMTREE and keyword terms)** |
| --- | --- | --- |
| #1 Bipolar Disorder  *(linked by OR)* | "Bipolar and Related Disorders"[Mesh]  "bipolar"[tiab] AND ("disorder"[tiab] OR "disorders"[tiab])  “bipolar”[tiab] AND ("mania"[tiab] OR "manic"[tiab] OR "hypomanic"[tiab] OR "hypo-manic"[tiab] OR "hypo manic"[tiab] OR "hypomania"[tiab] OR "hypo-mania"[tiab] OR "hypo mania"[tiab]) | 'bipolar disorder'/exp  'bipolar':ti,ab NEAR/3 ('disorder':ti,ab OR 'disorders':ti,ab)  ‘bipolar’:ti,ab AND ('mania':ti,ab OR 'manic':ti,ab OR 'hypomanic':ti,ab OR 'hypo-manic':ti,ab OR 'hypo manic':ti,ab OR 'hypomania':ti,ab OR 'hypo-mania':ti,ab OR 'hypo mania':ti,ab) |
| #2 Atypical Antipsychotics | "Antipsychotic Agents"[Mesh]  “oral”[tiab] AND (aripiprazole[tiab] OR asenapine[tiab] OR cariprazine[tiab] OR clozapine[tiab] OR iloperidone[tiab] OR lurasidone[tiab] OR olanzapine[tiab] OR paliperidone[tiab] OR quetiapine[tiab] OR risperidone[tiab] OR ziprasidone[tiab])  “oral”[tiab] AND “atypical”[tiab] AND (“antipsychotic”[tiab] OR “antipsychotics”[tiab]) | 'atypical antipsychotic agent'/exp  (oral NEAR/3 (aripiprazole OR asenapine OR cariprazine OR clozapine OR iloperidone OR lurasidone OR olanzapine OR paliperidone OR quetiapine OR risperidone OR ziprasidone)):ti,ab  oral:ti,ab AND ((atypical NEAR/3 (antipsychotic OR antipsychotics)):ti,ab) |
| #3 Costs / Economics  *(linked by OR)* | "Costs and Cost Analysis"[Mesh]  ("medical"[tiab] OR "hospital"[tiab] OR "emergency"[tiab]) AND ("cost"[tiab] OR "costs"[tiab]) | 'health economics'/de OR  'health care cost'/exp OR  'pharmacoeconomics'/exp  ("medical"[tiab] OR "hospital"[tiab] OR "emergency"[tiab]) AND ("cost"[tiab] OR "costs"[tiab]) |
| #4 Treatment Patterns  *(linked by OR)* | "Treatment Failure"[Mesh:NoExp] OR  "Medication Adherence"[Mesh:NoExp] OR  "Drug Substitution"[Mesh:NoExp] OR "Drug Prescriptions"[Mesh:NoExp] OR  "Drug Utilization"[Mesh:NoExp] OR Patient Compliance"[Mesh:NoExp]  "oral"[tiab] AND ("drug"[tiab] OR "medication"[tiab]) AND ("treatment"[tiab] OR therap*[tiab]) AND "failure"[tiab]  "oral"[tiab] AND ("drug"[tiab] OR "medication"[tiab]) AND ("treatment pattern"[tiab] OR "treatment patterns"[tiab])  "oral"[tiab] AND ("drug"[tiab] OR "medication"[tiab]) AND (complianc*[tiab] OR adhere*[tiab] OR "switching"[tiab] OR "switch"[tiab] OR "substitution"[tiab] OR "utilization"[tiab]) | 'treatment failure'/de OR  'drug treatment failure'/de OR (no Mesh equivalent) 'medication compliance'/de  'drug substitution'/de OR  'prescription'/de OR  ‘patient compliance'/de  oral:ti,ab AND (drug:ti,ab OR medication:ti,ab) AND (((treatment OR therap*) NEAR/3 failure):ti,ab)  oral:ti,ab AND ('treatment pattern':ti,ab OR 'treatment patterns':ti,ab) AND (drug:ti,ab OR medication:ti,ab)  oral:ti,ab AND (((drug OR medication) NEAR/3 (complianc* OR adhere* OR switch OR switching OR substitution OR utilization)):ti,ab) |
| #5 Limits | Medline[sb] OR inprocess[sb] OR pubstatusaheadofprint | -- |
| #6 Language | English | English |
| #7 Date range | 2008 to present | 2008 to present |
| String | (#1 AND #2 AND #5 AND #6 AND #7) AND (#3 OR #4) | (#1 AND #2 AND #5 AND #6 AND #7) AND (#3 OR #4) |
| TOTAL | 243 records | 1721 records |

**Abbreviations**: de=index term; exp=explode index term; Mesh=medical subject heading; NEAR/x=proximity operator to find terms which are within 'n' words of each other (before or after); NoExp=do not explode index term; sb=subset; tiab/ti,ab=title/abstract; SGA=second-generation antipsychotic
Search executed on July 9, 2018

Due to the small number of hits in the NHS EED, a general search for economic evaluations in BD was run and the results screened for relevance to the research questions focused on SGA treatment outlined in this protocol as a cross check for economic evaluations that may be relevant and not otherwise identified (Table 9). This review considered 22 NHS EED records that were published between 2008 to 2014 (55 records excluded that were published prior to 2008). All NHS EED records were excluded during title/abstract review (7 records excluded that matched PubMed® and/or EMBASE® citations; 15 records excluded after eligibility criteria were applied).

**Table S2 NHS EED search for economic evaluations in bipolar disorder**

| **#** | **Search String** | **# Economic Evaluation Citations** |
| --- | --- | --- |
| 1 | bipolar | 81 |
| 2 | disorder* or illness* or diseas* or episod* or psychosis or syndrome | 9081 |
| 3 | mania or manic or hypomanic or hypo manic or hypo-manic or hypomania or hypo mania or hypo-mania | 28 |
| 4 | bipolar 1 | 57 |
| 5 | #1 AND (#2 OR #3) | 72 |
| String | #4 OR #5 | 77 |

**Notes**: *truncation/wildcard symbol

Search executed on July 9, 2018 without date limits.

**Table S3 Second-generation antipsychotic medications approved for the treatment of BD-I**

| **SGA** | **Route of Administration** | **Date of First FDA Approval for BD-I** | **Approved Indications in BD-I** | | |
| --- | --- | --- | --- | --- | --- |
| **Acute Manic or Mixed Episodes** | **BD-I Depressive Episodes** | **BD-I Maintenance Therapy** |
| olanzapine | oral | 3/17/2000 | Yes | No | Yes |
| risperidone | oral | 12/4/2003 | Yes | No | No |
| olanzapine/fluoxetine | oral | 12/24/2003 | No | Yes | No |
| quetiapine | oral | 1/12/2004 | Yes | Yes | Yes |
| ziprasidone | oral | 8/19/2004 | Yes | No | Yes |
| aripiprazole | oral | 9/29/2004 | Yes | No | Yes |
| asenapine | sublingual | 8/13/2009 | Yes | No | Yes |
| lurasidone | oral | 6/28/2013 | No | Yes | No |
| cariprazine | oral | 9/17/2015 | Yes | Yes | No |

**Notes**: Indication language has been adapted from product labels for ease of presentation.

Medications are listed in the order of first approval for BD-I; approvals for quetiapine do not include those for the extended-release formulation.

**Abbreviations**: BD-I, bipolar I disorder; FDA, US Food and Drug Administration

Source: FDA.gov website.8
